# Supplementary material
Source: Research Square preprint supplement (doi:10.21203/rs.3.rs-10285998/v1)
Supplement: Supplementary file 1 [file e5ae358a14f0dc4a4560c20a.xlsx]

## Sheet: Table 01
	Table 1 Input assumptions and detailed semantic tag system for utterances
	Item	Full name	Standardized expression and code example
	RU	utterance unit	[2026-07-03 08:19:03] TR-PM-001 "Delivery started."
	RD	radio terminal	Terminal ID (TR-PM-001)
	AC	actor role	Pump operator (PO), pouring foreman (PF)
	WZ	work zone	East beam, central area, and other work zones (WZ)
	WK	work	Pouring (POUR), pumping (PMP), compaction (CMP), leveling/finishing (FIN)
	AT	act	Report (RPT), command (CMD), acknowledgment (ACK), approval (APV), prohibition (PRH)
	OB	object	Pump (EQ.PMP), hose (EQ.HOS), formwork (TS.FW), cement paste (MQ.PST), worker (PS.WKR)
	TG	target	Worker (PS.WKR), pump (EQ.PMP), pouring work (WK.POUR)
	PH	phenomenon	Pressure rise (PRR), normal pressure (PRN), poor discharge (DIS), kink (KNK), imminent failure/deformation (DEF), leakage (LKG)
	DM	interjection/discourse	Call (CALL), response (ACK), exclamation (EXC)
	CC	profanity/emotion	Profanity (PRF), urgency (URG), rebuke (RBK)

## Sheet: Table 02
	Table 2 Second layer: judgment concepts derived from relation patterns
	Hazard signal (HS)
		Derived judgment concept	Derivation basis
		Pump pressure risk (PPR), hose kink (HK), worker exposure risk (WER), formwork failure risk (FFR), cement paste leakage (CPL), form tie loosening (FTL)	Derived only from object-phenomenon binding (phen)
	Control action (CA)
		Derived judgment concept	Derivation basis
		Quality check (QCK), start pouring (SPG), low-speed pumping (MLS), worker clearance (CW), truck guidance (TRK), opening access control (OAC), continue pouring (CP), delivery amount reduction (RED), zone movement (MZ), pipeline inspection (IL), hose inspection (IH), hose adjustment (AH), restart (RS), clearance confirmation (WC), restart approval (RA), pump stop (SP), residual pressure release (PR…	Derived only from act-target binding (tgt)
	Situation state (ES)
		Derived judgment concept	Derivation basis
		Normal pouring (NP), in progress (IP), zone completed (ZC), warning (W), temporary control in progress (P), controlled (CTL), resolved (R), critical risk (CR), emergency stop (ESD), work suspended (SUS), restart prohibited (RP), suspension maintained before inspection (SUI)	Derived only from state transition rules

## Sheet: Table 03
	Table 3 Relation-pattern-based judgment rules
	Rule	Relation pattern	Derived result
	R1	Pump (EQ.PMP) -phen- pressure rise (PH.PRR)	Pump pressure risk (HS.PPR)
	R2	Hose (EQ.HOS) -phen- kink (PH.KNK)	Hose kink (HS.HK)
	R3	Formwork (TS.FW) -phen- imminent failure/deformation (PH.DEF) or opening (PH.GAP)	Formwork failure risk (HS.FFR)
	R4	Cement paste (MQ.PST) -phen- leakage (PH.LKG)	Cement paste leakage (HS.CPL)
	R5	Form tie (TS.FT) -phen- opening (PH.GAP)	Form tie loosening (HS.FTL)
	R6	Command (AT.CMD) -tgt- worker (PS.WKR) with clearance/evacuation verb and active hazard	Worker exposure risk (HS.WER) + worker clearance (CA.CW) or evacuation (CA.EV)
	R7	Command (AT.CMD) or execution report -tgt- pump (EQ.PMP) with stop verb	Pump stop (CA.SP)
	R8	Command (AT.CMD) or execution report -tgt- delivery amount (EQ.DCH) with reduction verb	Delivery amount reduction (CA.RED)
	R9	PH.PRN and active HS.PPR	conf (resolution) followed by ES.R
	R10	Newly generated temporary-structure-related HS (FFR, FTL, CPL)	ES.CR critical risk
	R11	CA.SP instruction or execution	ES.ESD emergency stop
	R12	AT.PRH for restart target	CA.RP followed by ES.RP restart prohibited
	R13	No active hazard and no hazard phenomenon	ES.NP or ES.IP
	R14	CC.PRF or CC.URG	Not involved in hazard signal generation; urgency is assigned only through urg relation
	R15	Directive or state expression without target object, or dictionary-unregistered expression	Automatic confirmation prohibited; review hold

## Sheet: Table 04
	Table 4 Radio terminal assignment table
	Terminal ID	Role code	User role	Assigned zone
	TR-PM-001	PO	Pump operator	East pump truck placement zone
	TR-QC-002	QM	Quality manager	Ready-mixed concrete entry and testing zone
	TR-SG-003	SG	Signal person	Ready-mixed concrete entry and pouring zone
	TR-GW-004	GW	General worker	Third-floor slab pouring zone
	TR-FM-005	FI	Formwork personnel	Lower part of third-floor beam
	TR-CN-006	PF	Pouring foreman	Third-floor slab pouring zone
	TR-SM-010	SM	Site manager	Site office and patrol route
	TR-SF-011	SF	Safety manager	Third-floor stairwell and opening area

## Sheet: Table 05
	Table 5 Examples of reference ontology mapping
	Time	Key utterance	Work	Act	Object	Target	Phenomenon	Discourse/emotion tag	Derived hazard	Derived action	State
	08:09:04	Yes, sending it slowly. The pressure is okay now.	PMP	ACK, RPT	EQ.PMP	-	PRN	DM.ACK (response)	None	MLS	IP
	10:21:14	Pressure is kicking up. It is not coming out well. I should check the line once.	PMP, INS	RPT	EQ.PMP, EQ.PIP	-	PRR, DIS	DM.CALL (call)	PPR	IL	W
	10:21:24	Reduce the amount for now. Quickly check whether the hose is folded in the central area.	INS	CMD	EQ.DCH, EQ.HOS	EQ.DCH, EQ.HOS	-	DM.CALL (call), CC.URG (urgency)	None	RED, IH	P
	13:42:08	The east beam wakku (site slang: formwork) looks like it may burst. Noro (site slang: cement paste) is showing underneath.	-	RPT	TS.FW, MQ.PST	-	DEF, LKG	DM.CALL (call)	FFR, CPL	None	CR
	13:44:20	Stop all east-side pouring. Reinforce the formwork and do not restart until it is checked.	POUR, REI	CMD, PRH	TS.FW	WK.POUR, TS.FW	-	-	None	SUS, RFW, RP	RP

## Sheet: Table 06
	Table 6 Ontology relation changes by key event
	Time	Standardized utterance content	Newly generated or updated relations	Applied rule	Derived state
	08:09:04	Pump pressure normal report	RU -dev-> TR-PM-001; EQ.PMP -phen-> PH.PRN	R13	IP
	10:21:14	Pump pressure rise and poor discharge report	EQ.PMP -phen-> PH.PRR; EQ.PMP -phen-> PH.DIS -> HS.PPR	R1	W
	10:21:39	Hose kink and pressure-rise cause candidate report	EQ.HOS -phen-> PH.KNK -> HS.HK; PH.KNK -cause-> PH.PRR	R2	W
	10:23:31	Pump pressure normalization confirmation report	EQ.PMP -phen-> PH.PRN; PH.PRN -conf-> HS.PPR (resolution)	R9	R
	13:42:08	Formwork imminent deformation and cement paste leakage report	TS.FW -phen-> PH.DEF -> HS.FFR; MQ.PST -phen-> PH.LKG -> HS.CPL; PH.LKG -co-> PH.DEF	R3, R4	CR
	13:42:15	Pump stop instruction and ongoing formwork deformation report	AT.CMD -tgt-> EQ.PMP -> CA.SP; TS.FW -phen-> PH.DEF; CC.URG -urg-> AT.CMD	R3, R7, R11, R14	ESD
	13:44:20	East-side pouring stop, formwork reinforcement, and no restart before inspection	AT.CMD -tgt-> WK.POUR, TS.FW -> CA.SUS, CA.RFW; AT.PRH -> CA.RP; CA.RP -until-> WK.INS	R12	RP

## Sheet: Table 07
	Table 7 Evaluation summary of ontology extraction
	Item	Reference count	Agreement	Disagreement (omission)	Review hold	Excess	Agreement rate against reference	Review-hold rate
	Detailed tags (7 axes)	145	139	1	5	0	95.9%	3.4%
	Relation generation	44	38	2	4	2	86.4%	9.1%
	Hazard signal derivation	10	9	0	1	0	90.0%	10.0%
	Control action and target	33	32	0	1	0	97.0%	3.0%
	Situation state	25	25	0	0	0	100.0%	0.0%
	Non-hazard judgment for normal utterances	18	18	0	0	0	100.0%	0.0%

## Sheet: Table 08
	Table 8 Representative extraction judgments
	Time	Key utterance	Reference value	Rule-based extraction value	Judgment	Reason
	08:09:04	The pressure is okay now.	PH.PRN, no hazard, IP	PH.PRN, no hazard, IP	Agreement	Normal phenomenon expression is applied before hazard words
	10:21:24	Reduce the amount for now.	CA.RED (delivery amount reduction)	CA.RED	Agreement	The target of the reduction command is bound to delivery amount, preventing excess interpretation as pump stop (SP)
	13:42:15	Stop the pump right away. (profanity) Hurry.	CA.SP, CC.PRF, ES.ESD	CA.SP, CC.PRF, ES.ESD	Agreement	Profanity is treated as an urgency cue, not a hazard signal, according to R14
	08:31:10	The vibrator should follow the discharge, and narashi should be handled immediately from behind.	WK.CMP, WK.FIN, TG.WK.CMP, TG.WK.FIN	WK.CMP agreed, narashi held for review, compaction target omitted	Hold/disagreement	narashi is held under R15. The target of the preceding clause connected by a conjunctive ending is omitted due to insufficient sentence-pattern cues
	13:42:21	Confirmed, stopping it now. I will release the pressure and wait.	TG.EQ.PMP, CA.SP, CA.PRL	CA.PRL agreed, SP and target held	Hold	The target of the stop verb (pump) appears in the 13:42:15 utterance, so it cannot be confirmed from the utterance alone; R15 applied
	13:43:36	The form tie side has opened, and the lower part is opening too. If more is poured, it may burst immediately.	HS.FTL, HS.FFR, ES.CR	HS.FTL agreed, HS.FFR held, ES.CR agreed	Hold	lower part and may burst appear without an explicit object and are held under R15. The state is derived as CR from the newly derived FTL alone
	13:44:20	Reinforce the formwork and do not restart until it is checked.	AT.CMD -tgt-> TS.FW	AT.PRH -tgt-> TS.FW	Disagreement	Act-type attachment is misaligned because command (reinforcement) and prohibition (restart prohibition) overlap within one clause

## Sheet: Table 09
	Table 9 Disagreement and review-hold types
	Type	Representative expression	Effect	Improvement direction
	Ambiguous semantic range of site term	narashi	Work-axis tag and target may differ	Add distinctions for work stage, target object, and control intensity to the terminology dictionary before confirmation
	Omitted target across utterances	(13:42:15 pump stop instruction) -> (13:42:21) stopping it	Confirmation of the stop action target depends on the preceding utterance	Review and introduce an anaphora rule that inherits the same equipment context from the immediately preceding instruction
	State expression without target object	The lower part is opening, it may burst	Derivation of hazard signal (FFR) is held	Reinforce the location dictionary connecting zone/part expressions such as lower part and underneath to temporary structure objects
	Directive connected by conjunctive ending	The vibrator should follow the discharge	The target of the preceding clause is omitted	Add an act inheritance rule for conjunctive-ending clauses
	Act type in complex command-prohibition sentence	Reinforce and ... do not restart	Act type attachment in relations is misaligned	Add a rule for decomposing multiple acts within a clause
